# Supplementary material for: Identification and Functional Characterization of Oxidosqualene Cyclases from Medicinal Plant Hoodia gordonii
Source: MDPI journal article supplement (doi:10.3390/plants13020231), 2024-01-14
Supplement: s1 [file s1]

# Identification and Functional Characterization of Oxidosqualene Cyclases from Medicinal Plant *Hoodia gordonii*

Iffat Parveen <sup>1,\*</sup>, Mei Wang <sup>3</sup>, Joseph Lee <sup>1</sup>, Jianping Zhao <sup>1</sup>, Yingjie Zhu <sup>2</sup>, Amar G. Chittiboyina <sup>1</sup>, Ikhlas A. Khan <sup>1,4</sup> and Zhiqiang Pan <sup>3,\*</sup>

## Supplementary Information

**Figure S1:** Graphical representation of *Hoodia gordonii* HgOSCs conserved domains.

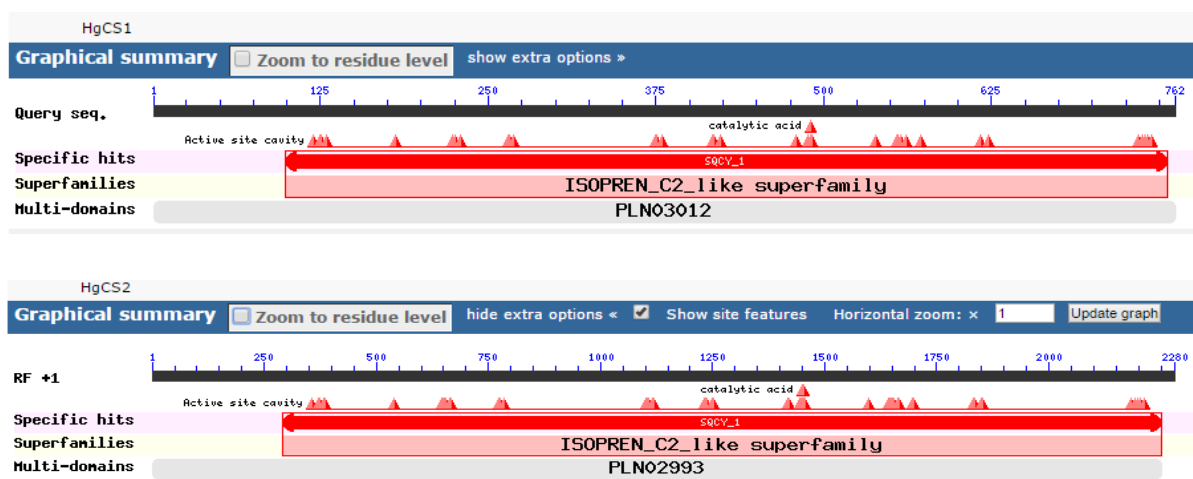

**Figure S2.** Amino acid alignments of HgOSC1 and HgOSC2 with oxidosqualene cyclases from plants. Four motifs rich motifs (Motif A-D), necessary for the binding of cationic cofactors are shown as boxes.

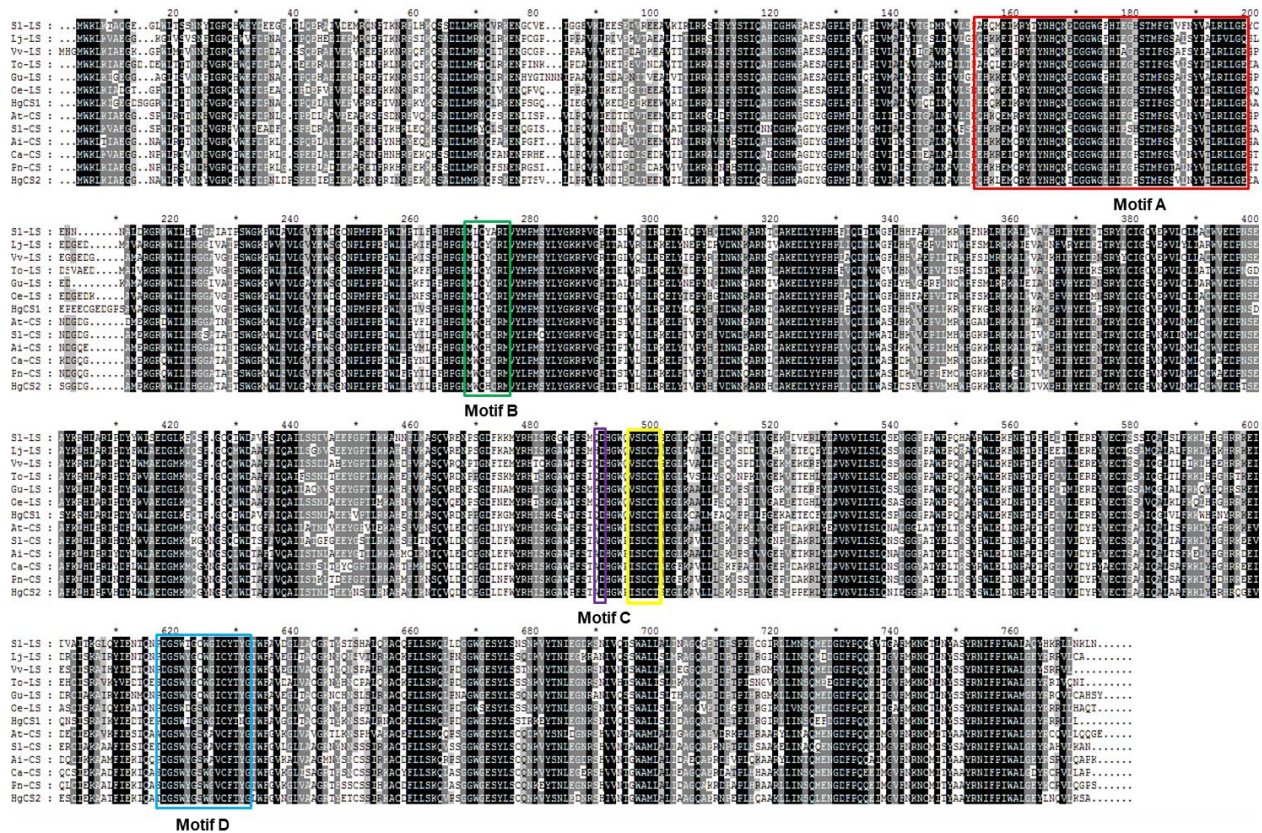

**Figure S3:** GC-MS mass spectrum of Lupeol

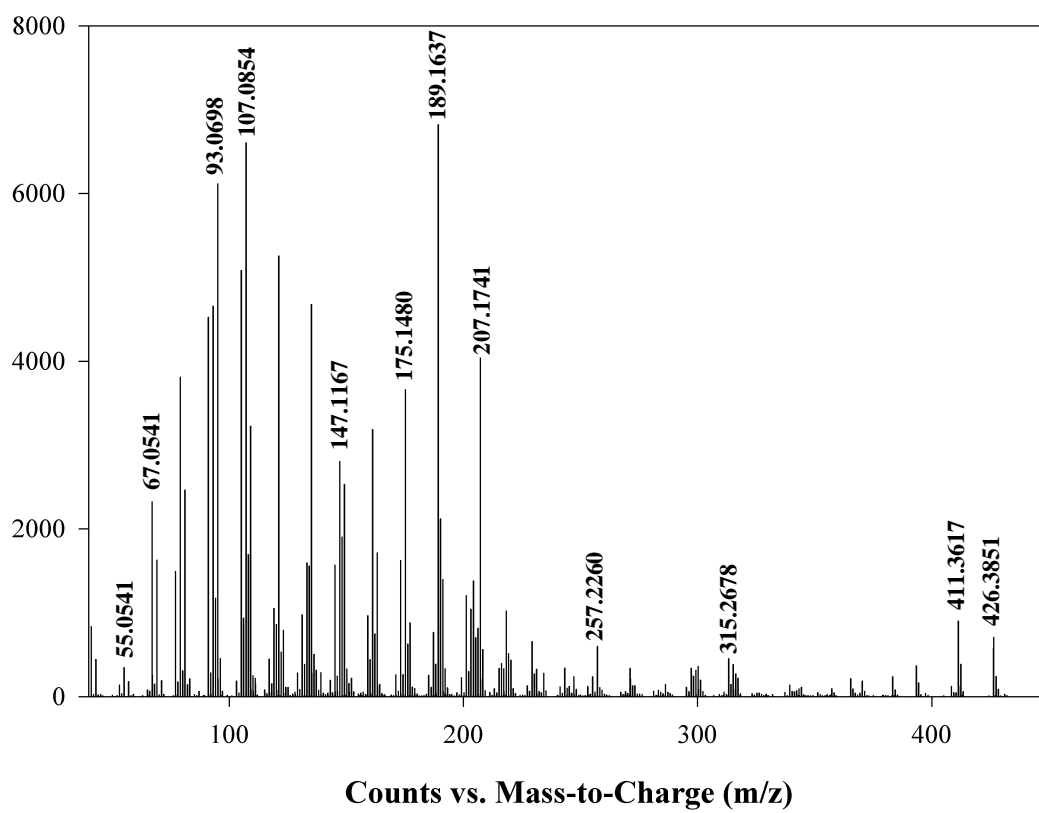

**Figure S4.** Thin-layer chromatography (TLC) and nuclear magnetic resonance (NMR) spectroscopy analyses. A, Compound extracts were separated on TLC (HG: hexane extract from yeast expressing HgOSC1; R: lupeol reference standard; V: hexane extract from yeast harboring vector as control). B and C, The  $^1\text{H}$  (B) and  $^{13}\text{C}$  (C) NMR spectra showing signals of the HgOSC1 product and the lupeol standard. The major signals of the  $^1\text{H}$  and  $^{13}\text{C}$  NMR spectra of the HgOSC1 product (lower panels of B and C) are comparable to those of the lupeol standard (upper panel of B and C).

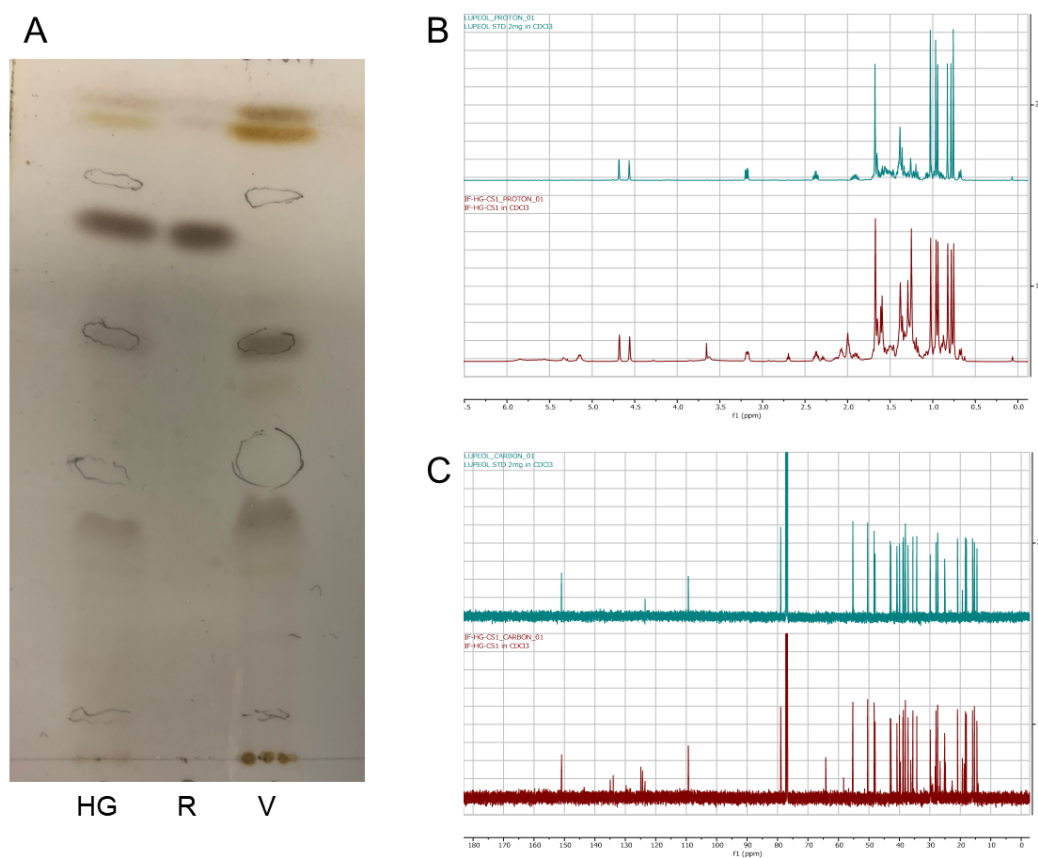

**Figure S5.** DNA sequence of *HgOSC2* synthesized for optimization of codon usage for expression in yeast.

ATGTGGAGATTGAAAATTGCTGAAGGTGGTAACGCATGGTTGAGAAGCTGTTAACTATGTTGGTAGACAATTCTGGGAATTCGATCCAAATT  
TGGATCCATCTCCAGAAGAAATCGAAGAAATCGAAAAAGCTAGAGAAAACCTTCAGAATTAATAGATTCGAAAAGAAACATTCAGCAGATTGGA  
TGATGAGAATCCAATTTTCTAAGGAAAACCAACTTCAGTTTTGTTGCCAAGAGTTGAAGTTAACGATATCGAAGATTGACAGAAGAAAATGT  
TACTTTGACATTGAAGAGAGCTATTAATTTCTATTCTACTTTACAAGGTCATGATGGTCATTGGGCTGGTGACTACGGTGGTCCAATGTTTTTGT  
ACCAGGTTTAGTTATTGCTTTGCTATTACAGGTGCTTTGAACGCAGTTTGTCAAAGCAACATAAGTTGGAAATGTGTAGATATTGTACAACC  
ATCAAAACATCGATGGTGGTGGGGTTTGCATATTGAAGGTCCATCTACTATGTTTCGGTTCAGTTTAACTACGTTACATTGAGATTGTTAGGTG  
AAGAAGCTTCTGGTGGTGACGGTGCAATGGAAAAAGGTAGAAAATGGATTTTGGATCATGGTGGTGCTACTGCAATTACATCTGGGGTAAAA  
TGTGGTTATCAGTTTTGGGTGCTTATGAATGGTCTGGTAATAATCCATTACCACCAGAAAATTTGGTTGTTACCATACTTGTACCATTTCATCCAGG  
TAGAATGTGGTGCATTGTAGAATGGTTTATTGCCAATGTCTTATTGTACGGTAAAAGATTTCGTTGGTCCAATCACTCCAACAATCTTGTCATTG  
AGAAGAGAATTGTACACAGTTCATACCATGAAGTTGATTGGAATAAGGCTAGAAACCATTGTGCAAAGGAAGATTGTACTACCCACATCCAT  
TGATCCAAGATATCTTGTGGGCTTCTTTGGATTCAATTGTTGAACAGTTATGATGCATTGGCCAGGTAAAAAGTTGAGAGAAAAGGCATTGAG  
AACTGTTATGGAACATATCCATTACGAAGATGAAAACACAAGATACATCTGTATCGGTCCAGTTAATAAGGTTTTGAACATGTTGTGTTGTTGGG  
TTGAAGATCCAACCTCTGAAGCTTTAAATTGCATATCCCAAGAGTTCATGATTATTTGTGGTTGGCAGAAGATGGTATGAAAATGCAAGGTTAC  
AATGGTTTCACAATTATGGGATACAGCTTTCGCAGTTCAAGCTATCATCTCTACTAATTTGACAGAAGAATATAATTCAACTTTGAGAAACGCTCAT  
GCATACATTAAGAATACACAAGTTCAAGATGATTGTCTGGTGACTTGGATTCTGGTACAGACATATCTCTAAGGGTGCTTGGCCATTTTCAACT  
GCAGATCATGGTTGGCCAATCTCTGATTGTACATCAGAAGGTTGAAGGCTGTTTTGTTGTTGCTAAGTTGTACCAGAATTGGTTGGTGAATC  
TTTGCCACCAGAAAAGTTGTACGATGCTGTTAAGCTTATCTTATCATTTGCAAAAATATTGAAGGTGGTTTCGCAACTTACGAATTGACAAGATCTTA  
CTCATGGTTAGAATTGATTAATCCAGCTGAAAACCTTTCGGTGACATCGTTATCGATTACCCATACGTTGAATGTACATCTGCTGCAATTCAAGCATTG  
GCTGCTTTTAAAGAAATTGTACCAAGACATAGACAAGGTGAAGTTGAATCATGTATCGAAAAGGCTGCAACTTTTATTGAAAAGATTCAAGCTA  
CAGATGGTTCTTGGTATGGTTTCATGGGGTGTGTTTTTACTTACGGTTTGTTGGTTTGGTGTAAATGGTTTAGTTGCTGCAGGTAGAACTTACGAA  
ACATGTTCTTCAATCAGAAAGGCATGTGATTCTTGTGTTGCTAAACAAGTTCCATCAGGTGGTTGGGGTGAATCTTATTTGTCATGTCAAAATAA  
GGTTTACTCTAATTGGAAGATAACAGATCAGATATCGTTAATACTGGTTGGGCTATGTTAGCATTGATTGCTGCAGGTCAAGCTGAAAGAAATC  
CAGAACCATTGCATCAAGCTGCAAAGTTGTTGATTAATTCTCAATTAGAAAATGGTGACTTCCACAACAAGAAATTATGGGTGTTTTTAATAAG  
AACTGTATGATCATACGCTGCATACAGAAACATCTTCCAATCTGGGCTTTGGGTGAATATTGAATCAAGTTTTAAATCTGCATAA

**Figure S6:** The corresponding mass spectra of (a) Squalene; (b) Cycloartenol; (c) Ergosterol and (d) Cycloartenol acetate from GC-MS analysis.

(a)

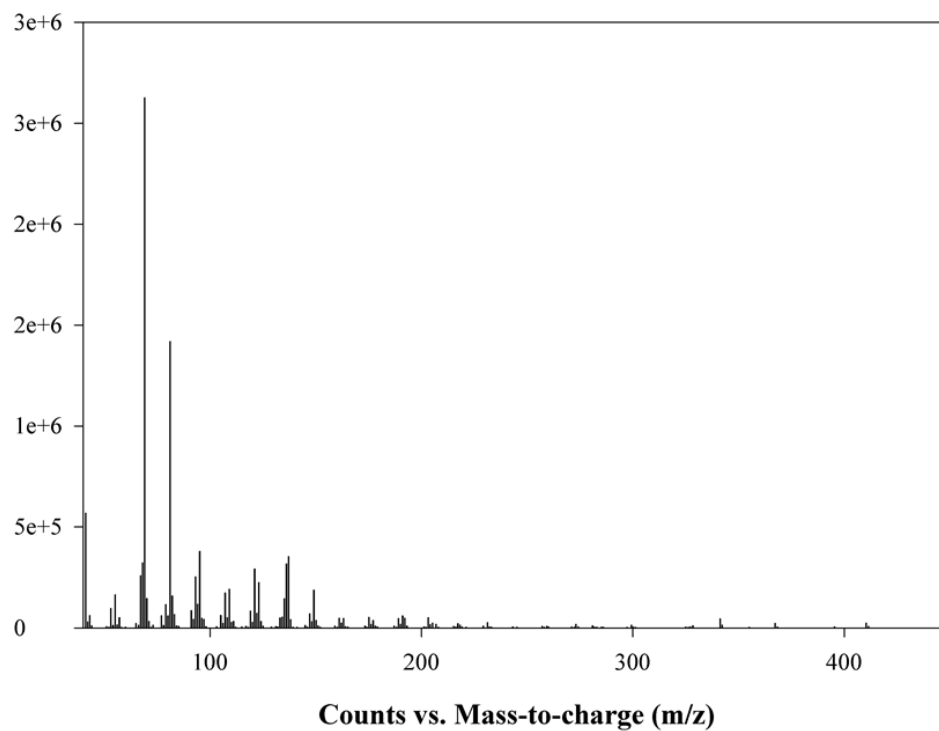

(b)

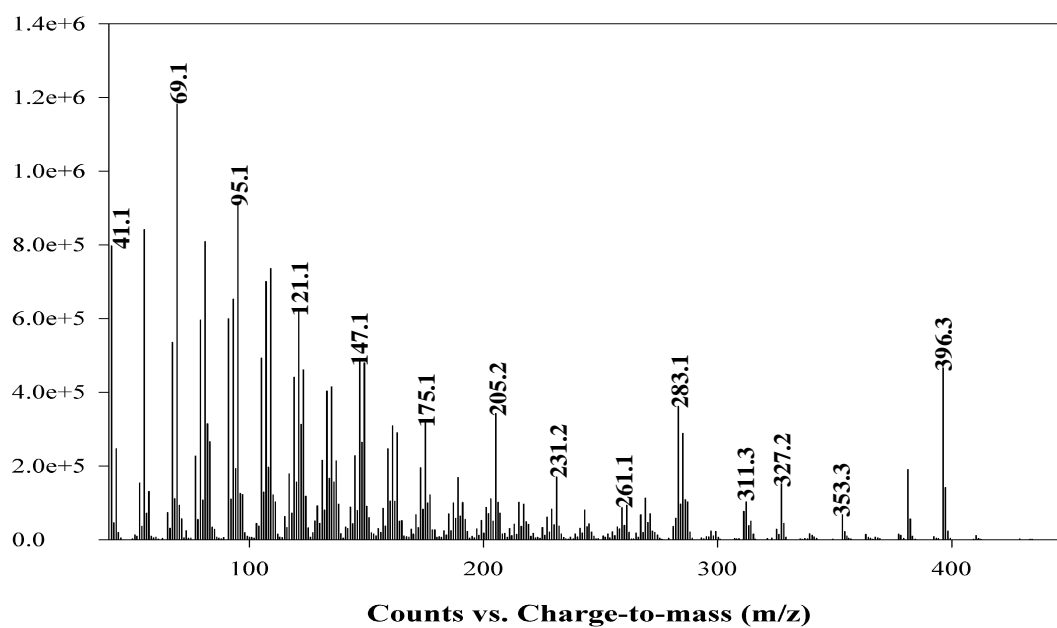

(c)

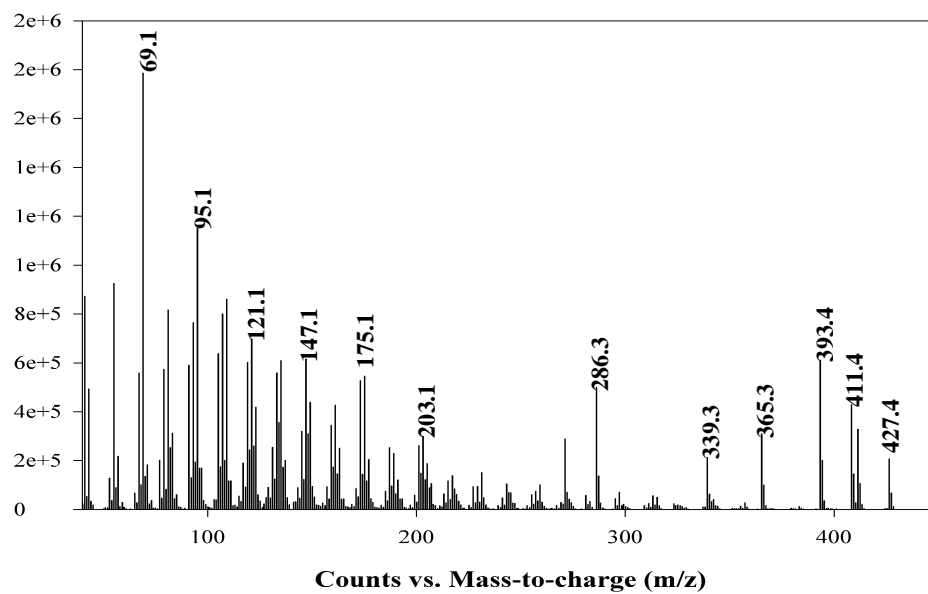

(d)

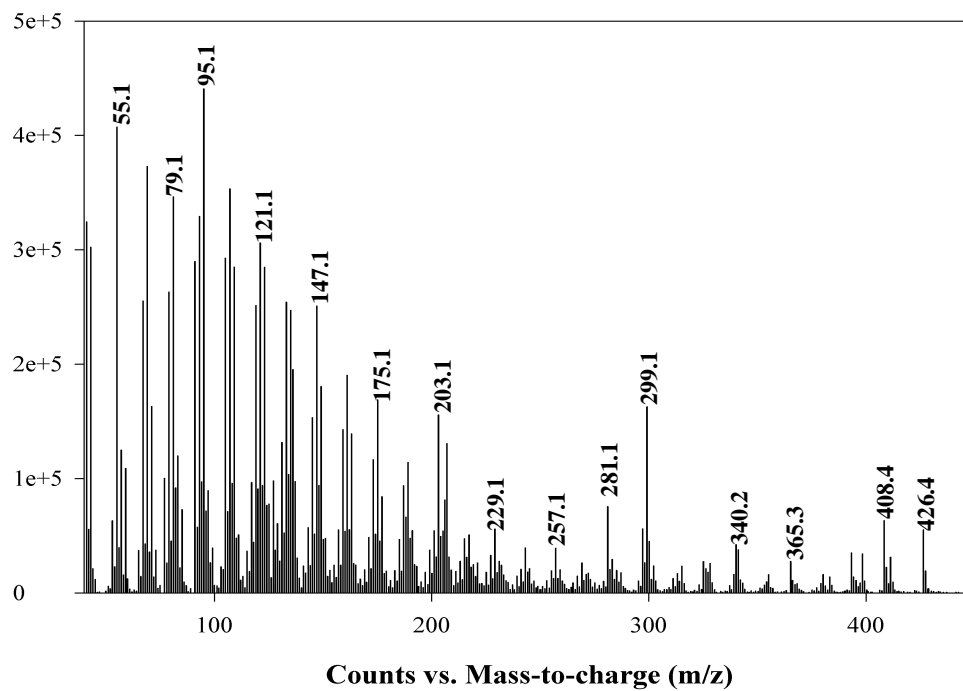

**Table S1:** Primers used for 5'- and 3' rapid amplification of cDNA ends (RACE).

| <b>Primer<br/>Code</b> | <b>Locus</b>                       | <b>Sequence (5'-3')</b>       |
|------------------------|------------------------------------|-------------------------------|
| P711                   | hga_locus_5882_iso_1_len_575 (F)   | TCCTGATGATGGTGATGGTGCTGTT     |
| P712                   | hga_locus_5882_iso_1_len_575 (Rev) | AGGACATTGGCATATAGGTGGTTCGAC   |
| P713                   | hga_locus_5300_iso_4_len_427 F     | TCTACCTCCTCTGGTGATGGCGTTGT    |
| P714                   | hga_locus_5300_iso_4_len_427 R     | CCACATTCTTCAGGCTCTGCTGCTTCT   |
| P715                   | hga_locus_3813_iso_1_len_390 F     | TGTTGGACGCATAACTGAGCTTGT      |
| P716                   | hga_locus_3813_iso_1_len_390 R     | AGCATATCTTGAGGTAAAGGATGAGGGT  |
| P717                   | hga_locus_11949_iso_1_len_446 F    | AAGCCCTTCGTACTGTGATGGAACA     |
| P718                   | hga_locus_11949_iso_1_len_446 R    | CTCAGTCAGGTTTGTGCGAAATAATCGCC |
| P719                   | hga_locus_2117_iso_1_len_589 F     | CTGAAGATAGCGGAGGGAGGGAA       |
| P720                   | hga_locus_2117_iso_1_len_589 R     | TCGTGGTAACAATACACTGGTTGGG     |
| P721                   | hga_locus_5625_iso_3_len_1014 F    | AGGCATCGTCAAGGAGAGGTGGAAAG    |
| P722                   | hga_locus_5625_iso_3_len_1014 R    | GTCCAGCAGCAATGAGAGCCAGCA      |
| P723                   | hga_locus_5748_iso_1_len_268 F     | TTGAAGATACACAGGAACCAGATGGC    |
| P724                   | hga_locus_5748_iso_1_len_268 R     | TACCACAGGCAGTCAATCCTCCTAC     |
